# Supplementary material
Source: PubMed Central journal article supplement (PMC4016822)

Exploring a Structural Protein-Drug Interactome for Drug Design and Repurposing:  
Genome-Wide Docking, Network Analysis, Patient Records Mining, Cellular and *In Vivo*  
Studies in Lung Cancer

Xiaodong Peng<sup>3,8</sup>, Fang Wang<sup>1</sup>, Liwei Li,<sup>1,3</sup> Khuchtumur Bum-Erdene,<sup>1,3</sup> Bo Wang<sup>1,14</sup>  
Tony Sinn,<sup>10,11</sup> Karen Pollok,<sup>10,11</sup> George Sandusky,<sup>13</sup> Lang Li,<sup>12</sup> Nasser Hanna,<sup>14</sup> John  
Turchi,<sup>14</sup> Shadia I. Jalal,<sup>14</sup> and Samy Meroueh<sup>1,3,7,9,11</sup>

<sup>1</sup>Department of Biochemistry and Molecular Biology, <sup>2</sup>Department of Pharmacology and Toxicology, <sup>3</sup>Center for Computational Biology and Bioinformatics, <sup>4</sup>Stark Neuroscience Research Institute, <sup>5</sup>Indiana University Cancer Center, <sup>6</sup>Department of Medicine, <sup>7</sup>Medical Neuroscience Program, <sup>8</sup>Regenstrief Institute, Inc., <sup>9</sup>Department of Medical and Molecular Genetics, <sup>10</sup>Herman B Wells Center for Pediatric Research, <sup>11</sup>In vivo Therapeutics Core, <sup>12</sup>Department of Biostatistics, Indiana University School of Medicine, <sup>13</sup>Department of Pathology and Laboratory Medicine, <sup>14</sup>Department of Medicine, Indianapolis, IN 46202, <sup>15</sup>Department of Chemistry and Chemical Biology, Indiana University Purdue University Indianapolis (IUPUI), Indianapolis, Indiana, 46202.

E-mail: [smeroueh@iupui.edu](mailto:smeroueh@iupui.edu)

**RECEIVED DATE (to be automatically inserted after your manuscript is accepted if required according to the journal that you are submitting your paper to)**

TITLE RUNNING HEAD

Genome-wide docking of approved drugs for drug design and repurposing

## Supporting Information

Supporting Information Table 1

| Disease       |                         | ICD-9 codes                                                                                                             |
|---------------|-------------------------|-------------------------------------------------------------------------------------------------------------------------|
| Hypertension  |                         | 401, 402, 403, 404, 405                                                                                                 |
| Migraine Pain |                         | 346                                                                                                                     |
| Cancer        | Prostate                | 185, 233.4                                                                                                              |
|               | Breast                  | 174, 233.0                                                                                                              |
|               | Lung and Bronchus       | 162.0, 162.2, 162.3, 162.4, 162.5,<br>162.8, 162.9                                                                      |
|               | Colon and Rectum        | 153.0, 153.1, 153.2, 153.3, 153.4,<br>153.6, 153.7, 153.8, 153.9, 154.0,<br>154.1, 154.8, 197.5, 230.3, 230.4,<br>235.2 |
|               | Urinary Bladder         | 188.1, 188.2, 188.3, 188.4, 188.5,<br>188.6, 188.7, 188.8, 188.9, 233.7                                                 |
|               | Melanoma of Skin        | 172                                                                                                                     |
|               | Non-Hodgkin Lymphoma    | 200.0, 200.1, 200.2, 200.3, 200.4,<br>200.5, 200.6, 200.7, 202.0, 202.1,<br>202.2, 202.7                                |
|               | Kidney and Renal Pelvis | 189.0, 189.1                                                                                                            |
|               | Oral Cavity and Pharynx | 141, 142, 143, 144, 145, 146, 147,<br>148, 149, 230.0                                                                   |
|               | Leukimas                | 204, 205, 206, 207, 208                                                                                                 |
|               | Pancreas                | 157                                                                                                                     |
|               | Corpus and Uterus, NOS  | 179, 182, 233.2                                                                                                         |

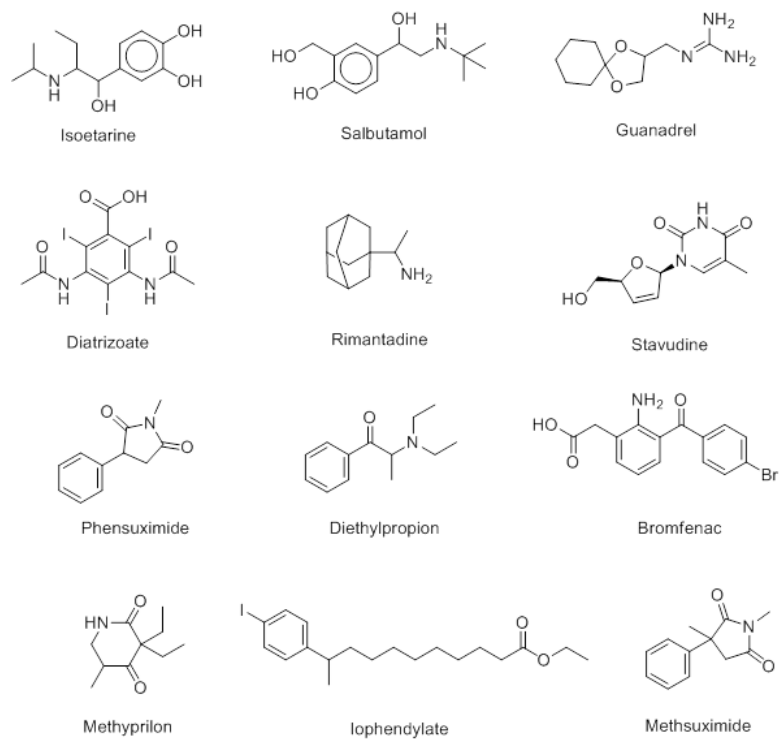

Fig. S1. Chemical structure of compounds that are selective to cancer targets

## Supporting Information Figure 2

### H460

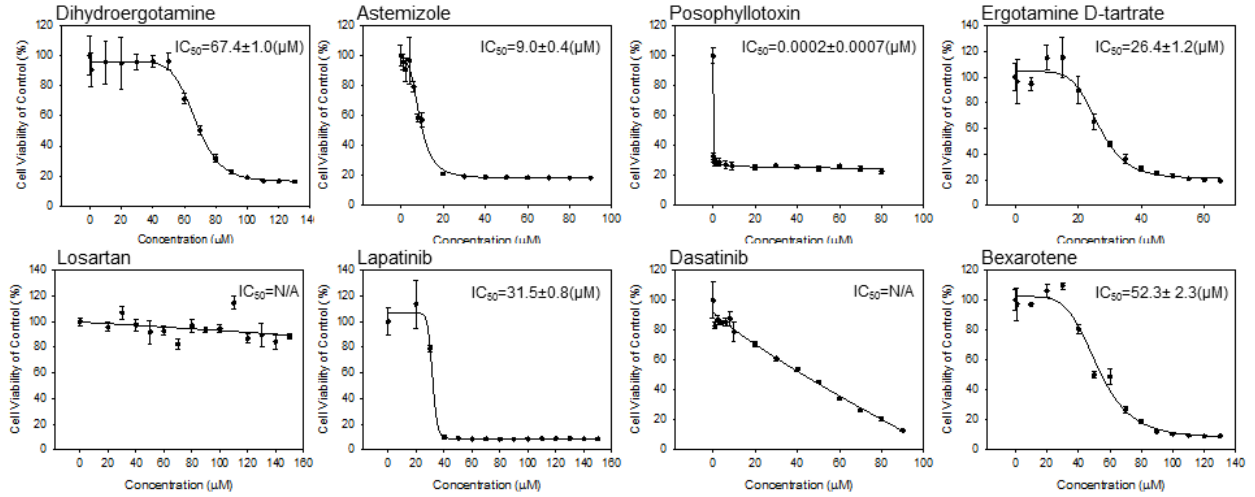

### Supporting Information Figure 3

#### H1299

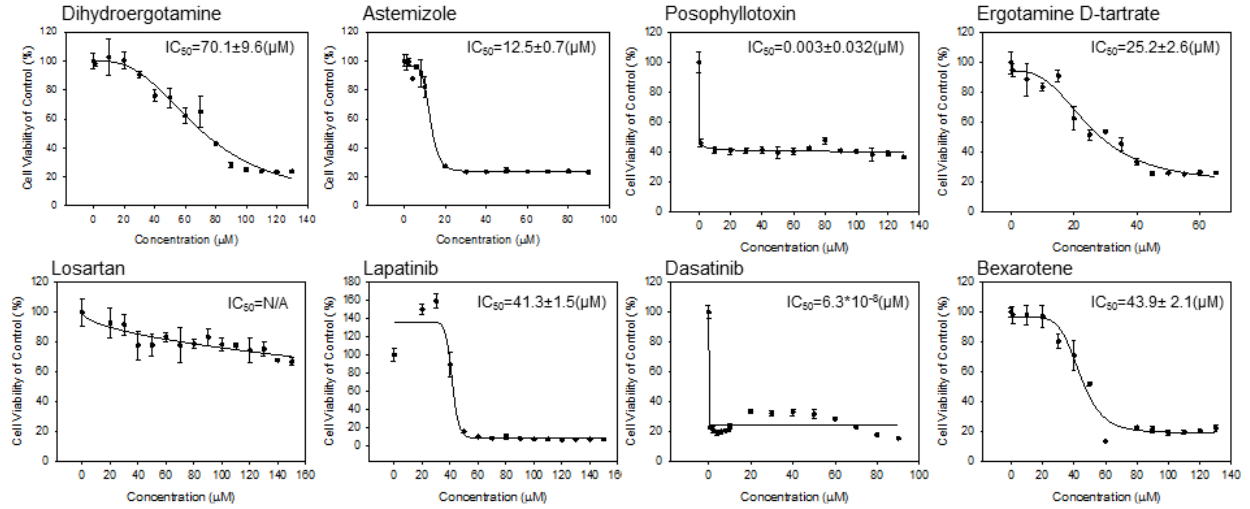

## Supporting Information Figure 4

### A549

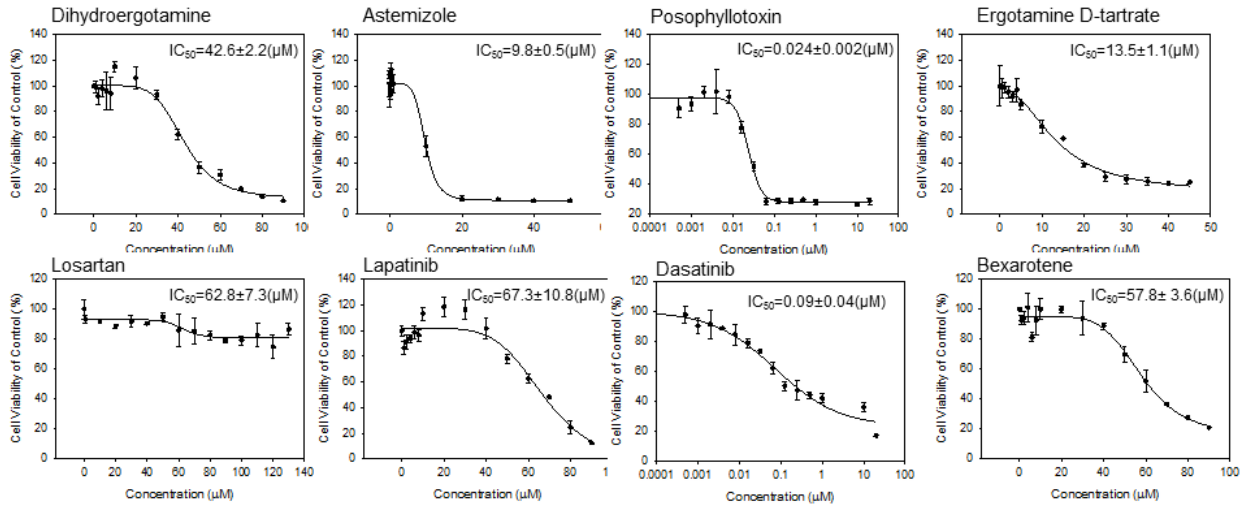

## Supporting Information Figure 5

### W138

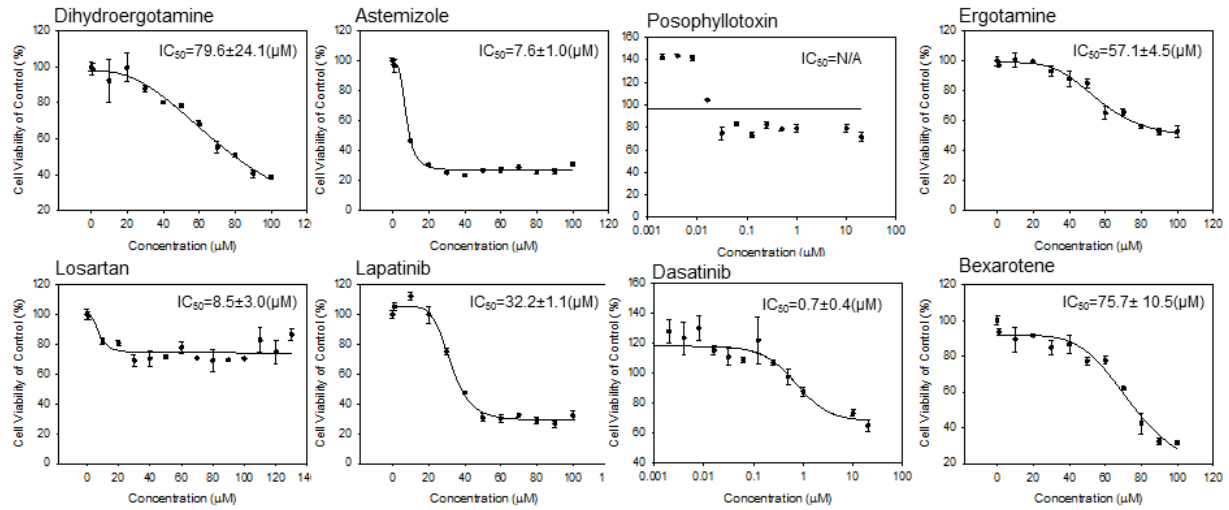

Supporting Information Figure 6

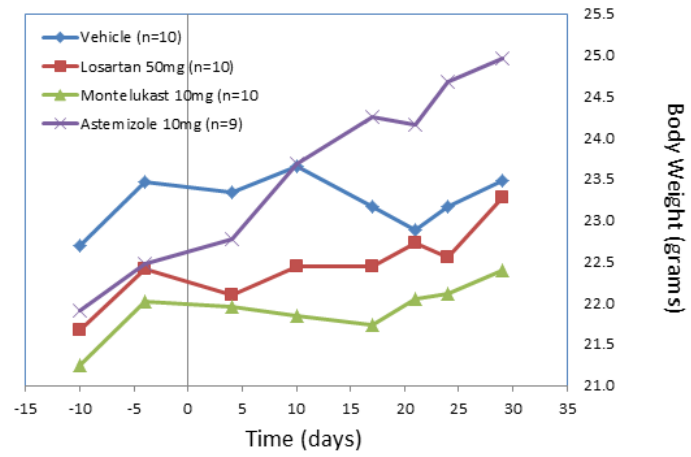

Supplement: NIHMS556934-supplement-Supplementary_Information.pdf [file NIHMS556934-supplement-Supplementary_Information.pdf]
